# Supplementary material
Source: PubMed Central journal article supplement (PMC7394187)
Supplement: NIHMS1516762-supplement-Supplementary_Material.pdf [file NIHMS1516762-supplement-Supplementary_Material.pdf]

## Revisiting the mystery of recent stratospheric temperature trends

Amanda C. Maycock<sup>1</sup>, William J. Randel<sup>2</sup>, Andrea K. Steiner<sup>3,4</sup>, Alexey Yu Karpechko<sup>5</sup>, John Cristy<sup>6</sup>, Roger Saunders<sup>7</sup>, David W. J. Thompson<sup>8</sup>, Cheng-Zhi Zou<sup>9</sup>, Andreas Chrysanthou<sup>1</sup>, N. Luke Abraham<sup>10,11</sup>, Hiderahu Akiyoshi<sup>12</sup>, Alex T. Archibald<sup>10,11</sup>, Neal Butchart<sup>13</sup>, Martyn Chipperfield<sup>1</sup>, Martin Dameris<sup>14</sup>, Makoto Deushi<sup>15</sup>, Sandip Dhomse<sup>1</sup>, Glauco Di Genova<sup>16</sup>, Patrick Jöckel<sup>14</sup>, Douglas E. Kinnison<sup>2</sup>, Oliver Kirner<sup>17</sup>, Florian Ladstädter<sup>3,4</sup>, Martine Michou<sup>18</sup>, Olaf Morgenstern<sup>19</sup>, Fiona O'Connor<sup>13</sup>, Luke Oman<sup>20</sup>, Giovanni Pitari<sup>21</sup>, David A. Plummer<sup>22</sup>, Laura E. Revell<sup>23,24,25</sup>, Eugene Rozanov<sup>24,26</sup>, Andrea Stenke<sup>24</sup>, Daniele Visioni<sup>16,21</sup>, Yousuke Yamashita<sup>27, †</sup>, Guang Zeng<sup>19</sup>

<sup>1</sup> School of Earth and Environment, University of Leeds, UK

<sup>2</sup> Atmospheric Chemistry, Observations and Modeling Laboratory, National Center for Atmospheric Research, Boulder, USA

<sup>3</sup> Wegener Center for Climate and Global Change, University of Graz, Graz, Austria

<sup>4</sup> Institute for Geophysics, Astrophysics, and Meteorology/Institute of Physics, University of Graz, Austria

<sup>5</sup> Finish Meteorological Institute, Helsinki, Finland

<sup>6</sup> Earth System Science Center, University of Alabama in Huntsville, USA

<sup>7</sup> Met Office, Exeter, UK

<sup>8</sup> Department of Atmospheric Science, Colorado State University, Fort Collins, USA

<sup>9</sup> National Oceanographic and Atmospheric Administration, Washington, USA

<sup>10</sup> Department of Chemistry, University of Cambridge, Cambridge, U.K.

<sup>11</sup> National Centre for Atmospheric Science, U.K.

<sup>12</sup> Center for Global Environmental Research, National Institute for Environmental Studies, Tsukuba, Japan

<sup>13</sup> Met Office Hadley Centre, Exeter, UK

<sup>14</sup> Deutsches Zentrum für Luft- und Raumfahrt (DLR), Institut für Physik der Atmosphäre, Oberpfaffenhofen, Germany

<sup>15</sup> Meteorological Research Institute, Tsukuba, Japan

<sup>16</sup> Center of Excellence CETEMPS, Università dell'Aquila, Italy

<sup>17</sup> Steinbuch Centre for Computing, Karlsruhe Institute of Technology, Karlsruhe, Germany

<sup>18</sup> Météo-France/CNRS, Toulouse, France

<sup>19</sup> National Institute of Water and Atmospheric Research (NIWA), Wellington, New Zealand.

<sup>20</sup> NASA Goddard Space Flight Center, Greenbelt, USA

<sup>21</sup> Department of Physical and Chemical Sciences, Università dell'Aquila, 67100 L'Aquila, Italy

<sup>22</sup> Climate Research Branch, Environment and Climate Change Canada, Montreal, QC, Canada.

<sup>23</sup> Bodeker Scientific, Christchurch, New Zealand

<sup>24</sup> Institute for Atmospheric and Climate Science, ETH Zurich, Zurich, Switzerland

<sup>25</sup> School of Physical and Chemical Sciences, University of Canterbury, Christchurch, New Zealand

<sup>26</sup> Physikalisch-Meteorologisches Observatorium Davos/World Radiation Center, Davos, Switzerland

<sup>27</sup> National Institute of Environmental Studies (NIES), Tsukuba, Japan

† Now at Japan Agency for Marine-Earth Science and Technology (JAMSTEC), Yokohama, Japan

Corresponding author: Amanda C. Maycock ([a.c.maycock@leeds.ac.uk](mailto:a.c.maycock@leeds.ac.uk))

## Contents of this file

Figures S1 to S2

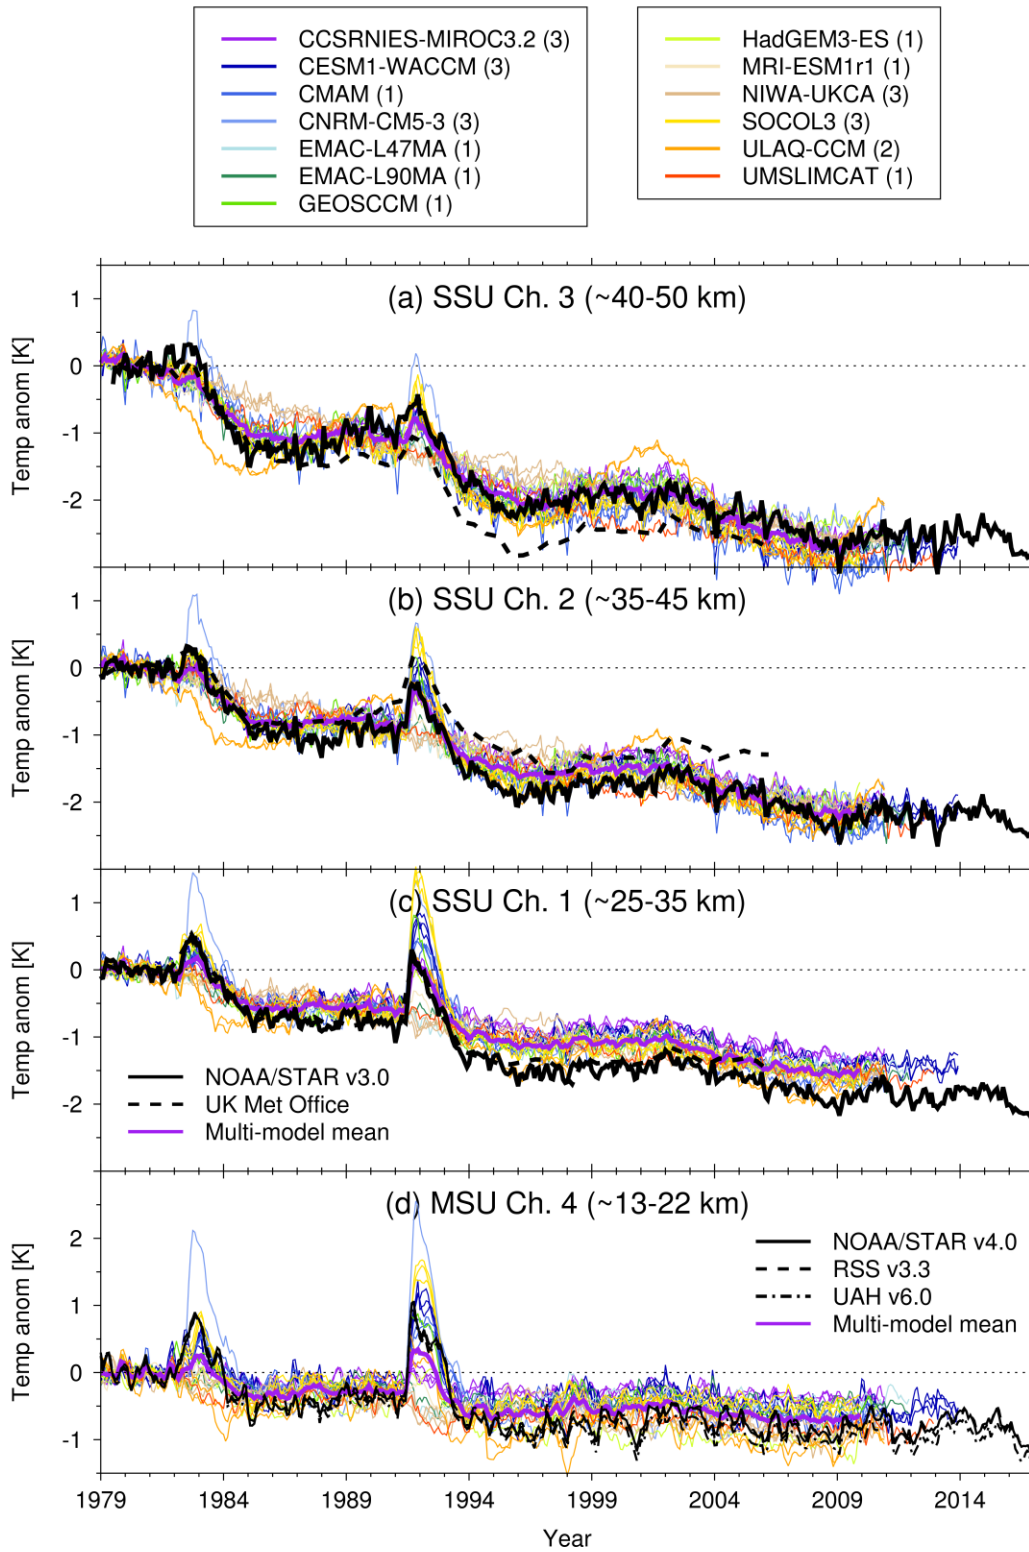

**Figure S1.** As in Figure 1 of the main text, but showing the CCMI refC1 simulations compared to satellite stratospheric temperature measurements.

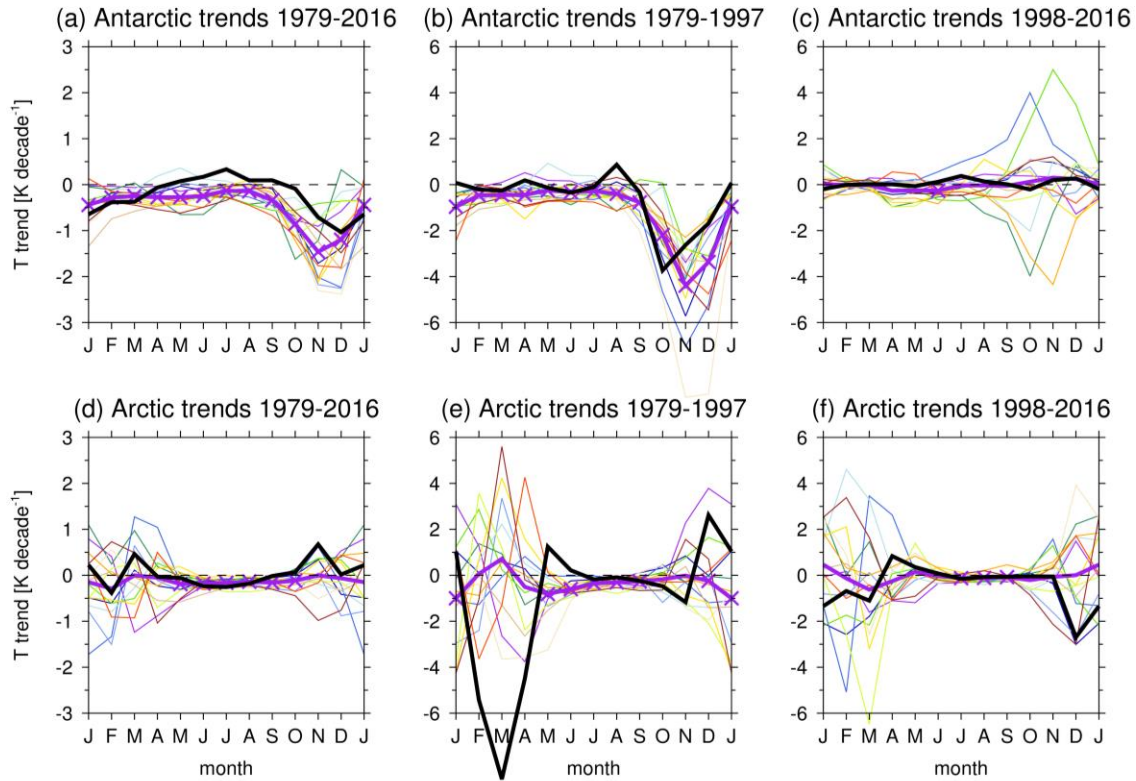

**Figure S2. Lower stratospheric ( $MSU_4$ ,  $\sim 13$ - $22$  km) temperature trends [ $K\ decade^{-1}$ ] by month for the (a-c) Antarctic ( $70$ - $90^\circ S$ ) and (d-f) Arctic ( $70$ - $90^\circ N$ ) for the periods 1979-2016 (a,d), 1979-1997 (c,e) and 1998-2016 (c,f). Black shows the NOAA/STAR v4.0 MSU-AMSU-A dataset. Colours show refC2 simulations from the CCMI models (see Figure 1 for colour legend). The thick purple line shows the trend in the multi-model mean. Purple crosses denote months where at least 10 of the 14 models ( $\sim 70\%$ ) agree on the sign of the trend.**
